1 Grandparent inference from genetic data: The potential for parentage-based tagging programs to  
2 identify offspring of hatchery strays

3

4 Thomas A. Delomas<sup>1\*</sup> and Matthew Campbell<sup>2</sup>

5

6 <sup>1</sup>Pacific States Marine Fisheries Commission / Idaho Department of Fish and Game, Eagle Fish  
7 Genetics Laboratory, 1800 Trout Rd, Eagle, ID 83616

8

9 <sup>2</sup>Idaho Department of Fish and Game, Eagle Fish Genetics Laboratory, 1800 Trout Rd, Eagle,  
10 ID, 83616

11

12 \*Corresponding author: [thomas.delomas@idfg.idaho.gov](mailto:thomas.delomas@idfg.idaho.gov)

13

14 Running head: Grandparent-grandchild trio inference

15

16 Abstract

17 Fisheries managers routinely use hatcheries to increase angling opportunity. Many  
18 hatcheries operate as segregated programs where hatchery-origin fish are not intended to spawn  
19 with natural-origin conspecifics in order to prevent potential negative effects on the natural-  
20 origin population. Currently available techniques to monitor the frequency with which hatchery-  
21 origin strays successfully spawn in the wild rely on either genetic differentiation between the  
22 hatchery- and natural-origin fish or extensive sampling of fish on the spawning grounds. We  
23 present a method to infer grandparent-grandchild trios using only genotypes from two putative  
24 grandparents and one putative grandchild. We developed estimators of false positive and false  
25 negative error rates and showed that genetic panels containing 500 - 700 single nucleotide  
26 polymorphisms or 200 - 300 microhaplotypes are expected to allow application of this technique  
27 for monitoring segregated hatchery programs. We discuss the ease with which this technique can  
28 be implemented by pre-existing parentage-based tagging programs and provide an R package  
29 that applies the method.

30

## 31 Introduction

32 Fisheries managers have long used hatcheries to increase angling opportunity and to  
33 compensate for anthropogenic impacts that have decreased population sizes (Waples et al. 2007).  
34 In some situations, it has been observed that hatchery-origin fish have lower fitness in the wild  
35 relative to natural-origin conspecifics, potentially due to selection in the hatchery environment or  
36 the use of hatchery strains that are not locally adapted (Ford 2002; Miller et al. 2004; Araki et al.  
37 2007a, 2007b, 2008; Christie et al. 2014). In order to prevent negative effects of hatchery- and  
38 natural-origin fish interbreeding, it has been recommended that hatcheries operate as either  
39 integrated or segregated programs (Hatchery Scientific Review Group 2009). Integrated  
40 programs aim to balance the proportion of natural-origin fish in the hatchery broodstock and the  
41 proportion of hatchery-origin fish spawning naturally to minimize the effect of domestication  
42 (Goodman 2005). Segregated programs intend to minimize gene flow between hatchery- and  
43 natural-origin populations (Mobernd et al. 2005; Hatchery Scientific Review Group 2009). These  
44 strategies, developed in the context of Pacific salmon hatcheries, represent alternative  
45 approaches to both protect natural-origin populations and provide harvest opportunities for  
46 anglers.

47 In order to evaluate the efficacy of segregated hatchery programs, a method of  
48 monitoring gene flow from hatchery-origin fish to nearby natural-origin populations is needed.  
49 This has been previously estimated in several ways. Some studies estimate the proportion of fish  
50 on the spawning grounds that are of hatchery origin (pHOS) through observation of marks and/or  
51 tags present on hatchery fish (Dauer et al. 2009; Tattam and Ruzycki 2020). This metric is  
52 important as it demonstrates the potential for competition between hatchery- and natural-origin  
53 fish on the spawning grounds and suggests that hatchery introgression may be occurring.

54 Alternatively, if the hatchery- and natural-origin populations show sufficient genetic  
55 differentiation, migration rates can be estimated from temporal samples (van Doornik et al.  
56 2013), or genetic structure of hatchery- and natural-origin populations can be evaluated to  
57 determine whether the pattern indicates hatchery introgression (Matala et al. 2012; Ozerov et al.  
58 2016; Lehnert et al. 2020). All of these approaches have drawbacks. Observing the proportion of  
59 hatchery-origin fish on the spawning grounds, while suggestive, does not directly assess gene  
60 flow as the reproductive success of hatchery-origin fish is unknown. Methods utilizing genetic  
61 differentiation are not applicable to cases without sufficient differentiation between the hatchery-  
62 and natural-origin populations, which is common where hatchery stocks were derived from  
63 nearby natural-origin populations.

64 An alternative technique uses genetic samples to infer relationships between hatchery  
65 broodstock and individuals sampled in the wild. Hatchery broodstock can be genetically sampled  
66 at the time of spawning, and their genotypes later used to infer whether a given fish is a  
67 descendent of hatchery broodstock. Parentage-based tagging (PBT) uses this approach to identify  
68 offspring of the hatchery broodstock for monitoring and management of hatchery stocks  
69 (Anderson and Garza 2005, 2006). Parentage-based tagging has been implemented and validated  
70 on large and small scales for a variety of species (DeHaan et al. 2008; Denson et al. 2012; Evans  
71 et al. 2018; Bingham et al. 2018; Campbell et al. 2019; Vandeputte et al. 2021), most notably  
72 Pacific salmonids (Steele et al. 2013, 2019; Beacham et al. 2019).

73 With appropriate methods for statistical inference, the general approach of PBT can be  
74 extended to identify grandchildren of hatchery broodstock. Genetic samples can be taken from  
75 hatchery broodstock, and samples from natural-origin fish can later be assessed to determine if  
76 they are grandchildren of those broodstock (and therefore had an unsampled, hatchery-origin

77 parent). The relationship being inferred is a grandparent-grandchild trio consisting of one  
78 grandchild and two grandparents on the same side (i.e., either both maternal or both paternal  
79 grandparents). The other two grandparents and the parents are unsampled and therefore have  
80 unknown genotypes (Figure 1). While comprehensive sampling in the hatchery is  
81 straightforward, similar sampling of adults spawning naturally is often logistically prohibitive.  
82 The ability to infer recent hatchery ancestry without sampling naturally spawning parents would  
83 overcome this issue.

84         Methods have previously been developed for inferring grandparent-grandchild  
85 relationships, but these methods are not optimal for inferring grandparent-grandchild trios.  
86 Letcher and King (2001) describe a method for inferring the relationship between all four  
87 grandparents and a grandchild. To identify offspring of hatchery strays, this method requires  
88 sampling natural-origin grandparents as well as hatchery broodstock which is not feasible in  
89 many situations. Christie et al. (2011) describe a method to infer grandparent-grandchild trios by  
90 identifying trios with no observed Mendelian incompatibilities (or less than a specified number).  
91 While this method has been successfully applied to situations where one parent is known  
92 (Christie et al. 2011; Sard et al. 2016), the lower power of exclusionary methods compared to  
93 likelihood-based methods (Anderson and Garza 2006) make exclusionary methods less feasible  
94 when no parents are sampled.

95         We here report a likelihood-based method to identify grandparent-grandchild trios using  
96 genotypes. Additionally, we develop techniques to estimate assignment error rates for this  
97 method and provide an R package implementing the described techniques  
98 (<https://github.com/delomast/gRandma>).

99

100 Methods

101 *Inferring grandparent-grandchild relationships*

102 Relationships have previously been inferred from genetic data using likelihood ratios to  
103 compare the putative relationship (e.g. parent-offspring) to an alternative relationship (typically  
104 that the individuals are unrelated) (Marshall et al. 1998; Anderson and Garza 2006; Kalinowski  
105 et al. 2007; Anderson 2012). Methods for calculating likelihoods of relationships (simple  
106 pedigrees) have previously been detailed (Thompson 1976, 2000; SanCristobal and Chevalet  
107 1997; Anderson and Garza 2006), and we extended this approach specifically to grandparent-  
108 grandchild trios. Given allele frequencies for a locus under Hardy-Weinberg equilibrium (HWE),  
109 the likelihood of the three individuals being unrelated was calculated as the product of the  
110 probability of sampling each genotype from the population. The likelihood of the individuals  
111 being a grandparent-grandchild trio was calculated by utilizing allele frequencies and the laws of  
112 Mendelian inheritance. Genotyping error was accounted for by marginalizing the true genotypes  
113 utilizing estimates of genotyping error (Anderson and Garza 2006). This allows genotyping error  
114 to be flexibly modeled in any way that yields, for a given true genotype, the probability of  
115 observing each genotype. With the R package we provide, users can specify these probabilities or  
116 utilize a default error model. The default error model, used in the analyses described in this  
117 study, is described in supplementary file 1. Loci were considered to be independent, as in  
118 previous methods of relationship inference and pedigree reconstruction (Marshall et al. 1998;  
119 Riester et al. 2009; Jones and Wang 2010; Anderson 2012; Huisman 2017).

120 Calculating likelihoods for large numbers of possible trios can be computationally  
121 intensive. We therefore implemented a preliminary screen based on the observed number of  
122 Mendelian incompatibilities (MI) in a grandparent-grandchild trio. Trios with more than  $m$  MIs

123 were excluded from consideration. The value of  $m$  was chosen so that the probability of  
124 excluding a true grandparent-grandchild trio was less than 0.0001 for a trio with no missing  
125 genotypes. With a constant value of  $m$ , the probability of rejecting a trio with one or more  
126 missing genotypes is smaller, as a locus with a missing genotype cannot be considered a  
127 Mendelian incompatibility. The probability of rejecting a true trio given a value of  $m$  was  
128 calculated by representing the number of MIs as a Markov Chain, following the method detailed  
129 by Anderson (2012) but extended to the relationship of grandparent-grandchild trio.

130         Assigning grandparent-grandchild relationships can be treated as a hypothesis test by  
131 comparing the calculated log-likelihood ratio (LLR) to a critical value,  $c$  (SanCristobal and  
132 Chevalet 1997; Anderson and Garza 2006). If the LLR was greater than or equal to  $c$ , the trio  
133 was considered related; otherwise, the trio was considered unrelated. The value of  $c$  can be  
134 chosen to achieve a desired balance of false negative and false positive error rates.

135

### 136 *False positive error rates*

137         Per-comparison false positive error rates (probability of assigning a relationship to a trio  
138 that is not a grandparent-grandchild trio) are dependent upon the true relationship for a trio. We  
139 have implemented methods to assess false positive error rates for unrelated trios (typically the  
140 most important) as well as 13 other types of relationships. In these relationships, the two putative  
141 grandparents were considered unrelated to each other, but the putative grandparents had different  
142 relationships to the putative grandchild. The relationships considered represented combinations  
143 of true grandparents, individuals unrelated to the putative grandchild, great-aunts, half-great-  
144 aunts, and first cousins of the putative grandchild's true grandparent.

145         Estimating the per-comparison false positive error rate for a given value of  $c$  has been

146 demonstrated for parent-offspring and sibling relationships using importance sampling  
147 (Anderson and Garza 2006; Baetscher et al. 2018), a Monte Carlo variance reduction technique.  
148 Variance reduction is needed as a naïve Monte Carlo approach would be inefficient at estimating  
149 very small false positive rates (Anderson and Garza 2006). Small error rates can be meaningful  
150 as the experiment-wide false positive error rate is estimated by the product of the per-comparison  
151 false positive error rate and the number of trios (with the corresponding true relationship)  
152 considered. We extended this approach to the current application of assessing grandparent-  
153 grandchild trios. We also implemented an alternative method utilizing stratified sampling,  
154 another Monte Carlo variance reduction technique, because specific implementations of  
155 importance sampling can produce unreliable results (Owen 2013).

156

### 157 *Importance sampling*

158 A standard Monte Carlo estimator of false positive rates would be to simulate genotypes  
159 for trios of a given relationship (such as unrelated) and record how many of them fit the criteria  
160 to be considered related. Importance sampling can be thought of as focusing the simulation on  
161 producing mostly genotypes that do assign and then correcting for this modification. To  
162 implement importance sampling, genotypes were simulated from the distribution of genotypes in  
163 true grandparent-grandchild trios. Missing genotypes were accounted for utilizing the forward-  
164 backward algorithm described below with the state of the Markov chain representing the number  
165 of missing genotypes in one individual. If the simulated trio had fewer than  $m$  MIs and the  
166 calculated LLR was greater than or equal to  $c$ , the observation was recorded as a false positive  
167 with the appropriate importance sampling weight (Owen 2013).

168



169 *Stratified sampling*

170           Similar to importance sampling, the goal of stratified sampling was to focus simulation  
171 effort on categories (strata) that produce false positives. We stratified the distribution of trio  
172 genotypes by the number of observed MIs. This was a natural choice because the algorithm we  
173 use explicitly filters possibilities based on the number of observed MIs. Therefore, we can  
174 eliminate simulating genotypes for most strata. Sampling effort can then be focused on trios with  
175  $m$  or fewer MIs. This method requires calculating the probability that a trio of given relationship  
176 has a given number of observed MIs and the ability to simulate genotypes for a trio given a  
177 relationship and number of MIs. Genotypes for trios were simulated in each stratum and the false  
178 positive rates were recorded. Utilizing the probabilities that a trio has each number of MIs (i.e.,  
179 the size of the strata), the overall false positive rate was then calculated.

180           To calculate the probability a trio has a given number of observed MIs, we represented  
181 the observation of MIs and missing genotypes as a Markov chain and utilized the forward step of  
182 the forward-backward algorithm. We extended the approach described by Anderson (2012) to  
183 account for the common practice of only analyzing samples given a maximum number of  
184 missing genotypes and to fit the target relationships. The maximum number of missing  
185 genotypes allowed in the current analyses was 10% of loci. Let  $s_i$  be the state, describing the  
186 number of observed MIs and missing genotypes, after observing locus  $i$ . Prior to observing any  
187 loci,  $s_0 = (0,0,0,0)$ , representing the number of observed incompatibilities and number of  
188 missing genotypes for the three individuals. Let  $a_i$  be a vector indicating whether an  
189 incompatibility or any missing genotypes are observed at locus  $i$ , in the same order as  $s_i$ .  
190 Assuming HWE, known allele frequencies, known probability of a genotype being missing, and  
191 observation of missing genotypes is independent across loci and individuals, the probabilities of

192 each possibility for  $a_i$  can be calculated according to standard probability arguments for a given  
193 true relationship. The probability of being in state  $x$  after a given locus can then be calculated as

$$P(s_{i+1} = x) = P(s_i) \sum_a P(a_{i+1}) I\{s_i + a_{i+1} = x\}. \quad (1)$$

194 This can be evaluated recursively to obtain the probabilities of each final state. The probability a  
195 trio has a given number of observed MIs can then be calculated given a maximum number of  
196 missing genotypes. However, memory constraints can make saving all the probabilities at each  
197 step impractical even with moderate numbers of loci. The probability of observing an individual  
198 with more than the allowed number of missing genotypes can be obtained through the same  
199 algorithm, but with  $s$  and  $a$  now only representing missing genotypes in one individual. Because  
200 we assumed that missing genotypes are independent between individuals, the probability of all  
201 three samples having a valid number of missing genotypes is then straightforward to calculate  
202 and only the probabilities of states with  $m$  or fewer MIs and with all three individuals having an  
203 allowable number of missing genotypes need to be saved.

204 To utilize stratified sampling, genotypes need to be simulated for trios with a specified  
205 number of MIs. The backwards step of the forward-backward algorithm fills this need. Given  $L$   
206 loci, a value of  $s_L$  is chosen given the number of MIs by sampling a categorical distribution with  
207 probabilities proportional to the probability of each  $s_L$  that has the specified number of MIs (and  
208 allowable number of missing genotypes). Next, for each locus and iterating backwards, a value  
209 for  $a_i$  is chosen by sampling a categorical distribution with

$$P(a_i | s_{i+1}) \propto P(a_i) P(s_i = s_{i+1} - a_i). \quad (2)$$

210 Once  $a_i$  is chosen, genotypes are sampled using the genotype frequencies for the true  
211 relationship calculated from the allele frequencies, HWE, laws of Mendelian inheritance, and  
212 genotyping error rates. If all three genotypes are observed (i.e., no missing genotypes in the

213 chosen  $a_i$ ), then the genotypes are either sampled conditional upon an MI being present or not.

214

215 *False negative error rate*

216 To estimate the per-comparison false negative error rate (probability of failing to assign a  
217 relationship to a true grandparent-grandchild trio) for a given value of  $c$ , Monte Carlo methods  
218 have been previously used for other relationships (Anderson and Garza 2006; Baetscher et al.  
219 2018) and we adopted this strategy here. Genotypes of grandparent-grandchild trios are  
220 simulated and loci with missing genotypes for each individual are chosen by representing the  
221 observation of missing genotypes as a Markov chain and utilizing the forward-backward  
222 algorithm, as described above with the state representing the number of missing genotypes in one  
223 individual. Log-likelihood ratios were calculated for the simulated genotypes, and the proportion  
224 of trios with the number of MIs greater than  $m$  or LLR less than  $c$  was the estimate of the false  
225 negative rate.

226

227 *Panel size simulations and error rate estimator evaluation*

228 A key question for designing experiments implementing this method is, how many loci  
229 need to be genotyped to obtain reliable assignments? To help answer this question, we estimated  
230 error rates for panels of different size. We simulated panels containing 100, 300, 500, 700, and  
231 900 biallelic single nucleotide polymorphisms (SNPs) and panels containing 100, 200, 300, and  
232 400 triallelic microhaplotypes. The SNPs and microhaplotypes were simulated with expected  
233 heterozygosity of 0.22 (allele frequencies of 0.125 and 0.872) and 0.42 (allele frequencies of  
234 0.13, 0.13, and 0.74), respectively. This choice reflects the mean expected heterozygosities for  
235 SNPs and microhaplotypes in a comparison of both marker types for relationship inference in

236 rockfish (Baetscher et al. 2018). The probability of a missing genotype at a locus was set at 3%  
237 in these analyses. It is common practice to remove any samples with more than a threshold  
238 number of missing genotypes, and so we restricted all simulated genotypes to have 90% or more  
239 genotypes present. False negative and false positive, given a true relationship of unrelated, error  
240 rates were estimated for a range of  $c$  values and the relationship between error rates was  
241 compared between panels. Integer values of  $c$  were chosen starting at 0 and increasing until the  
242 estimated false negative rate was above 0.05. Estimates of false negative rates and estimates  
243 from the importance sampling method were derived from 10,000 and 1,000,000 Monte Carlo  
244 iterations, respectively. Estimates from the stratified sampling routine were derived from  
245 1,000,000 iterations for each stratum (number of observed Mendelian incompatibilities) less than  
246 or equal to  $m$ .

247       To compare performance of the two methods for estimating false positive error rates, the  
248 estimated error rates for unrelated trios were compared between the methods with all four  
249 simulated microhaplotype panels. Estimates for other true relationships were compared using the  
250 300 locus microhaplotype panel. Finally, to examine the importance of modelling the presence of  
251 missing genotypes, we compared importance sampling estimates using the 300 locus  
252 microhaplotype panel with the probability of a genotype being missing equal to 3% and 0%.

253       The scripts used to perform these simulations and their outputs are available at  
254 <https://github.com/delomast/gpError2021>.

255

### 256 *Example analyses*

257       To fully evaluate false positive per-comparison error rates, one needs to have a general  
258 idea of the size of the analysis (number of comparisons) being attempted. We consider two

259 examples modeled around steelhead *Oncorhynchus mykiss* hatchery programs in the Snake River  
260 basin using data collected during 2018. The Upper Salmon B-run (USB) represents a smaller  
261 hatchery program and spawned 66 steelhead in 2018. The Dworshak National Fish Hatchery  
262 (DNFH) represents a larger hatchery program and spawned 1,778 steelhead in 2018. Both of  
263 these hatchery programs take genetic samples from all broodstock and record the day of  
264 spawning, phenotypic sex, and crosses made. Data collected at the hatchery (or a genetic sex  
265 marker) can be used to constrain the number of possible pairs of grandparents considered in an  
266 analysis. For each hatchery program, we consider the effect on the desired per-comparison false  
267 positive rate of using no data, phenotypic sex, spawn day, phenotypic sex and spawn day, or  
268 cross records.

269 In the example analysis, we assume that natural-origin juveniles are sampled and that  
270 exact age is unknown but is constrained to one, two, or three years old. The effect of this  
271 assumption is that three potential years of parents must be considered for each juvenile.  
272 Hatchery-origin steelhead in the Snake River basin return almost exclusively as three and four  
273 year old fish (Warren et al. 2017), so this translates to four years of potential grandparents that  
274 must be considered.

275 The total number of comparisons in these analyses is the product of the number of  
276 possible pairs of grandparents per year, the number of years of potential grandparents being  
277 considered (four), and the number of potential grandchildren evaluated (assumed here to be 200).  
278 We then calculate the desired per-comparison false positive (true relationship of unrelated) error  
279 rate to achieve an expected number of false positive assignments of 0.1 ( $0.1 / \text{number of}$   
280 comparisons) assuming all trios are unrelated. This ignores false positives arising from trios of  
281 other relationships. In some situations, error rates for alternative relationships are important to

282 consider, but in analyses of segregated hatchery programs (where no breeding of hatchery-origin  
283 and natural-origin fish is desired), false positives arising from trios of other relationships are not  
284 necessarily harmful as the purpose is to identify fish with recent hatchery-origin ancestry.

285 Additionally, the vast majority of trios considered are likely unrelated, and so the false-positive  
286 rate for unrelated trios will often be the most impactful.

287

## 288 Results

289 Estimated error rates declined with increasing panel size, and the microhaplotype panels  
290 showed lower error rates than SNP panels of similar size (Figure 2). For example, false positive  
291 error rates (true relationship of unrelated) below  $10^{-10}$  were achieved at false negative error rates  
292 below 0.05 with SNP panels containing 700 or more loci and microhaplotype panels containing  
293 300 or more loci. False positive rates for related trios decreased with decreasing relatedness  
294 between individuals in the trio (Supplemental Figure 1).

295 False positive rates estimated by importance sampling and stratified sampling were  
296 practically identical when estimates were above approximately  $10^{-8}$  (Figure 3). As the false  
297 positive rate decreased below this, the importance sampling method estimated false positive rates  
298 higher than the stratified sampling method. In these cases, the stratified sampling method  
299 estimated false positive rates of 0 within one or more strata (i.e., no false positives were sampled  
300 out of the 1,000,000 iterations). Similar results were obtained for false positive rates estimated  
301 for trios with relationships other than unrelated (Figure 4) except for two trio types (true  
302 grandparent and unrelated; true grandparent and cousin of grandparent) that had noticeably  
303 different estimates between the two methods and did not have a low false positive rate.

304 Incorporating a 3% missing genotype rate in the error rate estimation had a moderate

305 effect on the results (Figure 5). For example, at a false negative rate of 0.05, the false positive  
306 (true relationship of unrelated) error rates were approximately (derived from linear interpolation  
307 with neighboring points)  $1.3 \cdot 10^{-11}$  and  $2.1 \cdot 10^{-12}$  when missing genotypes had rates of 3% and  
308 0%, respectively.

309         The example hatchery programs considered show that analysis of smaller programs (e.g.,  
310 USB) require per-comparison false positive rates on the order of  $10^{-6}$  -  $10^{-8}$  depending on what  
311 data, if any, is available to reduce the number of comparisons (Table 1). Larger programs, similar  
312 to DNFH, require rates on the order of  $10^{-7}$  -  $10^{-10}$  if the number of comparisons can be reduced  
313 by one of the data sources considered. Error rates estimated for the simulated panels (Figure 2)  
314 suggest that these rates can be achieved with panels containing 500 - 700 SNPs or 200 - 300  
315 microhaplotypes. If no data is available to reduce the number of pairs of grandparents that must  
316 be considered, then hatchery programs similar in size to DNFH (1,700 fish spawned / year) will  
317 require error rates on the order of  $10^{-11}$ , which is achievable with panels containing 700 - 900  
318 SNPs or 300 - 400 microhaplotypes.

319

## 320 Discussion

321         The methods developed here facilitate direct monitoring of introgression between  
322 hatchery- and natural-origin populations without relying on genetic differentiation. This fills an  
323 unmet need for monitoring the segregated hatchery programs upon which many fisheries rely.  
324 The method identifies fish with an unsampled, hatchery-origin parent using genetic samples from  
325 the hatchery broodstock and estimates error rates given allele frequencies for a population.

326         Another benefit of this method is the ease with which it can be implemented through  
327 existing PBT programs because the hatchery and laboratory processes required to sample and

328 genotype broodstock are already in place. Additional requirements for grandparent inference  
329 would be the development of a genetic panel with sufficient power (given the size of the relevant  
330 hatcheries) and collection of samples from natural-origin fish that are potential grandchildren of  
331 the hatchery broodstock. In the past decade, there have been multiple, large-scale demonstrations  
332 of the efficacy of PBT for monitoring fisheries (Steele et al. 2013, 2019; Beacham et al. 2019).  
333 Numerous PBT programs have been recently reported (Evans et al. 2018; Bingham et al. 2018;  
334 Campbell et al. 2019; Vandeputte et al. 2021) and current tagging technologies can be replaced  
335 by PBT to provide additional benefits at similar or reduced costs (Beacham 2021). This implies  
336 that PBT will continue to grow in usage, and the method described here will become feasible for  
337 a larger number of hatchery programs.

338         The simulated microhaplotype panels demonstrated that error rates low enough for  
339 relatively large analyses of segregated hatchery programs are achievable with panels containing  
340 300 - 400 microhaplotypes. The size/power required from the genetic marker panel will depend  
341 on the data available to limit the number of comparisons. As has been previously demonstrated,  
342 the availability of accurate hatchery cross-records greatly reduces the power required for  
343 grandparent inference (Letcher and King 2001), but we note that simply having sex information  
344 associated with a broodstock individual's genotype can have a sizeable effect (Table 1). Panels  
345 genotyping hundreds of loci have been created using cost-effective, amplicon sequencing  
346 techniques (Campbell et al. 2015; Janowitz-Koch et al. 2019), and so we conclude that  
347 grandparent inference with this method is feasible using current genotyping techniques.

348         Application of this method at larger scales will require considering potential grandparents  
349 from multiple hatcheries. In these situations, having data available to reduce the number of  
350 comparisons can be critical for making an analysis feasible. For example, if natural-origin



351 steelhead are sampled at Lower Granite Dam on the Snake River (Hargrove et al. 2021), then all  
352 steelhead hatcheries adjacent to and upstream of the dam must be considered (approximately  
353 5,000 total steelhead spawned annually). With no data other than the year and hatchery at which  
354 fish were spawned, the number of potential pairs of grandparents would be approximately  $5.5 \cdot$   
355  $10^6$  each year, while considering phenotypic (or genetic) sex would reduce this to  $1.4 \cdot 10^6$   
356 (IDFG, unpublished).

357 We expect this method to be most applicable for assessing segregated hatchery programs.  
358 For some closely related trios, false positive error rates were relatively high with the 300  
359 microhaplotype panel (Supplemental Figure 1). For all analyses, the impact of these error rates is  
360 mediated by the infrequency of comparisons involving closely related individuals. When  
361 analyzing segregated programs, false positives from closely related trios may not negatively  
362 impact conclusions as they indicate recent hatchery ancestry. However, when analyzing  
363 integrated hatchery programs, distinguishing trios with different relationships can be important.  
364 Application of this method could then either be infeasible or require a more powerful genetic  
365 panel. Additionally, the number of relationships for which we provide estimators covers trios  
366 with a range of relatedness but is not exhaustive. In some specific cases, other relationships may  
367 be present at impactful frequencies. For example, if generations overlap substantially then the  
368 impact of trios containing aunts, half-aunts, and first-cousins may need to be considered.

369 The method developed here addressed shortcomings of previously developed methods for  
370 grandparent inference with moderately sized genetic panels. Previous methods required either  
371 that all four grandparents were sampled (Letcher and King 2001) or used an exclusionary method  
372 that inherently had lower power than likelihood-based methods (Christie et al. 2011).  
373 Additionally, the exclusionary method did not provide a formal treatment of genotyping error.

374 Applications of the exclusionary method (Christie et al. 2011; Sard et al. 2016) have utilized  
375 panels of tens of microsatellites. When using SNPs or microhaplotypes, hundreds or thousands  
376 of loci are typically genotyped and minimal error rates (e.g., 1%) still result in errors being  
377 present in a majority of individuals. An additional effect of ignoring genotyping error in an  
378 exclusionary method is that false negatives are implicitly assumed not to occur. It is worth noting  
379 that use of a Markov chain to model the number of observed Mendelian incompatibilities and  
380 missing genotypes in a trio, as we developed here, could be incorporated into the exclusionary  
381 method. This would allow both the formal incorporation of genotyping error and estimation of  
382 false positive and false negative error rates.

383 Importance sampling and stratified sampling have different weaknesses, making each  
384 better suited to different situations. For example, importance sampling can perform suboptimally  
385 when the estimate is dominated by a small fraction of samples (Owen 2013). Stratified sampling  
386 does not have this same drawback, but it can fail to give a meaningful estimate when the false  
387 positive rate within a particular stratum is low enough that a reasonable number of samples  
388 cannot estimate it accurately. Comparison of the importance sampling and stratified sampling  
389 methods showed that when the true relationship was unrelated, they estimated essentially the  
390 same false positive rate when that rate was above approximately  $10^{-8}$ . This suggests the  
391 importance sampling routine performed well for unrelated trios. At lower false positive rates, the  
392 stratified sampling estimates were lower (and in some cases 0) than those from importance  
393 sampling. In these cases, one or more strata had estimates of 0, indicating that the 1,000,000  
394 samples taken were not sufficient to observe one or more false positives. This demonstrates one  
395 of the strengths of importance sampling compared to stratified sampling - some situations will  
396 have false positive rates small enough they cannot be efficiently estimated by this stratified

397 sampling routine. This is further emphasized by the greater computational effort devoted to  
398 stratified sampling in this study (1,000,000 iterations in each stratum vs. 1,000,000 iterations  
399 total).

400 For false positive error rates under relationships other than unrelated, the importance  
401 sampling and stratified sampling estimates were again largely the same. In a few cases where one  
402 potential grandparent was the true grandparent and the other was not, the estimates were  
403 noticeably different and the stratified sampling method achieved at least 150 false positive  
404 observations in each strata. This suggests that for these relationships the importance sampling  
405 method may have performed suboptimally. Similar observations were made for importance  
406 sampling estimates of false positive error rates in parentage inference, where performance of a  
407 given importance distribution varied depending on the true relationship for which an error rate  
408 was estimated (Anderson and Garza 2006). One strategy would be to design an alternative  
409 importance distribution, but for closely related trios, error rates for most panels will likely be  
410 high enough that they are amenable to stratified sampling.

411 The current method assumes loci are in linkage equilibrium. If loci are physically linked  
412 (but still in equilibrium) the methods described here can be applied. Physical linkage of two loci  
413 will result in grandchildren being more likely to inherit alleles at both loci from one of the two  
414 grandparents in a trio. The estimated false positive (when true relationship is unrelated) error  
415 rates are not affected because unrelated individuals are not impacted by physical linkage. The  
416 Monte Carlo method we implement for estimating false negative error rates simulates trios  
417 assuming no linkage, but given the alleles present at two loci in the grandparents, the probability  
418 of a given combination of alleles being inherited by the grandchild is identical regardless of  
419 physical linkage (Supplemental file 1). Therefore, as long as the set of alleles present in the

420 grandparents (ignoring which grandparent is assigned which alleles) is simulated accurately, the  
421 frequency of combinations of grandparent alleles and grandchild alleles will be simulated  
422 accurately by assuming the loci are unlinked. The calculated LLR does not rely on assignment of  
423 genotypes to specific grandparents, and so the distribution of LLR, and thus the false negative  
424 error rate, is also simulated accurately by assuming the loci are unlinked.

425         One drawback of the method as implemented is that computational efficiency decreases  
426 with increasing numbers of alleles per locus. This is partly due to the flexibility of the  
427 genotyping error model and the need to marginalize over all possible true genotypes. In the  
428 current implementation, computation is sped up by precomputing likelihood values for observed  
429 trio genotypes at each locus. This works well when the number of alleles per locus is small, but  
430 as the number of alleles increases, this can become impractically slow. As such, the current  
431 implementation will be most suitable to panels containing biallelic SNPs and microhaplotypes,  
432 which in our experience typically have three to five alleles. For panels of highly variable loci, a  
433 different implementation of this method, particularly with a more streamlined genotyping error  
434 model, would be necessary.

435

#### 436 Acknowledgements

437 Funding for this project was provided by Bonneville Power Administration Project 2010-031-00.  
438 We would like to thank John Powell, John Hargrove, and Matt Corsi for providing comments  
439 that improved this manuscript. There is no conflict of interest declared in this article.

440

441 References

- 442 Anderson, E. C. 2012. Large-scale parentage inference with SNPs: An efficient algorithm for  
443 statistical confidence of parent pair allocations. *Statistical Applications in Genetics and*  
444 *Molecular Biology* 11(5):12.
- 445 Anderson, E. C., and J. C. Garza. 2005. A description of full parentage genotyping. Vancouver,  
446 British Columbia.
- 447 Anderson, E. C., and J. C. Garza. 2006. The power of single-nucleotide polymorphisms for  
448 large-scale parentage inference. *Genetics* 172(4):2567–2582.
- 449 Araki, H., W. R. Ardren, E. Olsen, B. Cooper, and M. S. Blouin. 2007a. Reproductive success of  
450 captive-bred steelhead trout in the wild: Evaluation of three hatchery programs in the Hood  
451 River. *Conservation Biology* 21(1):181–190.
- 452 Araki, H., B. A. Berejikian, M. J. Ford, and M. S. Blouin. 2008. Fitness of hatchery-reared  
453 salmonids in the wild. *Evolutionary Applications* 1(2):342–355.
- 454 Araki, H., B. Cooper, and M. S. Blouin. 2007b. Genetic effects of captive breeding cause a rapid,  
455 cumulative fitness decline in the wild. *Science* 318(5847):100–103.
- 456 Baetscher, D. S., A. J. Clemento, T. C. Ng, E. C. Anderson, and J. C. Garza. 2018.  
457 Microhaplotypes provide increased power from short-read DNA sequences for relationship  
458 inference. *Molecular Ecology Resources* 18(2):296–305.
- 459 Beacham, T. D. 2021. Parentage-based tagging combined with genetic stock identification is a  
460 cost-effective and viable replacement for coded-wire tagging in large-scale assessments of  
461 Canadian salmon fisheries. *Fisheries Research* 239:105920.
- 462 Beacham, T. D., C. Wallace, K. Jonsen, B. McIntosh, J. R. Candy, D. Willis, C. Lynch, J.-S. S.  
463 Moore, L. Bernatchez, and R. E. Withler. 2019. Comparison of coded-wire tagging with

- 464 parentage-based tagging and genetic stock identification in a large-scale coho salmon  
465 fisheries application in British Columbia, Canada. *Evolutionary Applications* 12(2):230–  
466 254.
- 467 Bingham, D. M., P. C. Gerrity, and S. Painter. 2018. Genetic tagging is an effective way to  
468 monitor survival of released hatchery saugers: Conservation efforts in the Wind River,  
469 Wyoming. *Environmental Practice* 20(4):92–103.
- 470 Campbell, M. R., N. V. Vu, A. P. LaGrange, R. S. Hardy, T. J. Ross, and S. R. Narum. 2019.  
471 Development and application of single-nucleotide polymorphism (SNP) genetic markers for  
472 conservation monitoring of burbot populations. *Transactions of the American Fisheries*  
473 *Society* 148(3):661–670.
- 474 Campbell, N. R., S. A. Harmon, and S. R. Narum. 2015. Genotyping-in-Thousands by  
475 sequencing (GT-seq): A cost effective SNP genotyping method based on custom amplicon  
476 sequencing. *Molecular Ecology Resources* 15(4):855–867.
- 477 Christie, M. R., M. J. Ford, and M. S. Blouin. 2014. On the reproductive success of early-  
478 generation hatchery fish in the wild. *Evolutionary Applications* 7(8):883–896.
- 479 Christie, M. R., M. L. Marine, and M. S. Blouin. 2011. Who are the missing parents?  
480 Grandparentage analysis identifies multiple sources of gene flow into a wild population.  
481 *Molecular Ecology* 20(6):1263–1276.
- 482 Dauer, M. B., T. R. Seamons, L. Hauser, T. P. Quinn, and K. A. Naish. 2009. Estimating the ratio  
483 of hatchery-produced to wild adult steelhead on the spawning grounds using scale pattern  
484 analyses. *Transactions of the American Fisheries Society* 138(1):15–22.
- 485 DeHaan, P. W., G. R. Jordan, and W. R. Ardren. 2008. Use of genetic tags to identify captive-  
486 bred pallid sturgeon (*Scaphirhynchus albus*) in the wild: Improving abundance estimates for

- 487 an endangered species. *Conservation Genetics* 9(3):691–697.
- 488 Denson, M. R., K. Brenkert, W. E. Jenkins, and T. L. Darden. 2012. Assessing red drum juvenile  
489 stocking in a South Carolina estuary using genetic identification. *North American Journal of*  
490 *Fisheries Management* 32(1):32–43.
- 491 van Doornik, D. M., D. L. Eddy, R. S. Waples, S. J. Boe, T. L. Hoffnagle, E. A. Berntson, and P.  
492 Moran. 2013. Genetic monitoring of threatened chinook salmon populations: estimating  
493 introgression of nonnative hatchery stocks and temporal genetic changes. *North American*  
494 *Journal of Fisheries Management* 33(4):693–706.
- 495 Evans, H. K., K. B. Carlson, R. Wisser, M. E. Raley, K. M. Potoka, and K. J. Dockendorf. 2018.  
496 Genetics and hatchery management: A parentage-based tagging approach to blueback  
497 herring conservation. *Journal of Fish and Wildlife Management* 9(1):1–13.
- 498 Ford, M. J. 2002. Selection in captivity during supportive breeding may reduce fitness in the  
499 wild. *Conservation Biology* 16(3):815–825.
- 500 Goodman, D. 2005. Selection equilibrium for hatchery and wild spawning fitness in integrated  
501 breeding programs. *Canadian Journal of Fisheries and Aquatic Sciences* 62(2):374–389.
- 502 Hargrove, J. S., C. A. Camacho, W. C. Schrader, J. H. Powell, T. A. Delomas, J. E. Hess, S. R.  
503 Narum, and M. R. Campbell. 2021. Parentage-based tagging improves escapement  
504 estimates for ESA-listed adult Chinook salmon and steelhead in the Snake River basin.  
505 *Canadian Journal of Fisheries and Aquatic Sciences* 78(4):349–360.
- 506 Hatchery Scientific Review Group. 2009. Columbia River hatchery reform system-wide report.
- 507 Huisman, J. 2017. Pedigree reconstruction from SNP data: parentage assignment, sibship  
508 clustering and beyond. *Molecular Ecology Resources* 17(5):1009–1024.
- 509 Janowitz-Koch, I., C. Rabe, R. Kinzer, D. Nelson, M. A. Hess, and S. R. Narum. 2019. Long-

- 510 term evaluation of fitness and demographic effects of a chinook salmon supplementation  
511 program. *Evolutionary Applications* 12(3):456–469.
- 512 Jones, O. R., and J. Wang. 2010. COLONY: A program for parentage and sibship inference from  
513 multilocus genotype data. *Molecular Ecology Resources* 10(3):551–555.
- 514 Kalinowski, S. T., M. L. Taper, and T. C. Marshall. 2007. Revising how the computer program  
515 CERVUS accommodates genotyping error increases success in paternity assignment.  
516 *Molecular Ecology* 16(5):1099–1106.
- 517 Lehnert, S. J., S. M. Baillie, J. MacMillan, I. G. Paterson, C. F. Buhariwalla, I. R. Bradbury, and  
518 P. Bentzen. 2020. Multiple decades of stocking has resulted in limited hatchery  
519 introgression in wild brook trout (*Salvelinus fontinalis*) populations of Nova Scotia.  
520 *Evolutionary Applications* 13(5):1069–1089.
- 521 Letcher, B. H., and T. L. King. 2001. Parentage and grandparentage assignment with known and  
522 unknown matings: Application to Connecticut River Atlantic salmon restoration. *Canadian*  
523 *Journal of Fisheries and Aquatic Sciences* 58(9):1812–1821.
- 524 Marshall, T. C., J. Slate, L. E. B. Kruuk, and J. M. Pemberton. 1998. Statistical confidence for  
525 likelihood-based paternity inference in natural populations. *Molecular Ecology* 7(5):639–  
526 655.
- 527 Matala, A. P., S. R. Narum, W. Young, and J. L. Vogel. 2012. Influences of hatchery  
528 supplementation, spawner distribution, and habitat on genetic structure of Chinook salmon  
529 in the South Fork Salmon River, Idaho. *North American Journal of Fisheries Management*  
530 32(2):346–359.
- 531 Miller, L. M., T. Close, and A. R. Kapuscinski. 2004. Lower fitness of hatchery and hybrid  
532 rainbow trout compared to naturalized populations in Lake Superior tributaries. *Molecular*



- 533 Ecology 13(11):3379–3388.
- 534 Mobernd, L. E., J. Barr, L. Blankenship, D. E. Campton, T. T. P. Evelyn, T. A. Flagg, C. V. W.  
535 Mahnken, L. W. Seeb, P. R. Seidel, and W. W. Smoker. 2005. Hatchery Reform in  
536 Washington State. *Fisheries* 30(6):11–23.
- 537 Owen, A. B. 2013. Monte Carlo theory, methods and examples.
- 538 Ozerov, M. Y., R. Gross, M. Bruneaux, J. P. Vähä, O. Burimski, L. Pukk, and A. Vasemägi. 2016.  
539 Genomewide introgressive hybridization patterns in wild Atlantic salmon influenced by  
540 inadvertent gene flow from hatchery releases. *Molecular Ecology* 25(6):1275–1293.
- 541 Riester, M., P. F. Stadler, and K. Klemm. 2009. FRANz: Reconstruction of wild multi-generation  
542 pedigrees. *Bioinformatics* 25(16):2134–2139.
- 543 SanCristobal, M., and C. Chevalet. 1997. Error tolerant parent identification from a finite set of  
544 individuals. *Genetical Research* 70(1):53–62.
- 545 Sard, N. M., D. P. Jacobson, and M. A. Banks. 2016. Grandparentage assignments identify  
546 unexpected adfluvial life history tactic contributing offspring to a reintroduced population.  
547 *Ecology and Evolution* 6(19):6773–6783.
- 548 Steele, C. A., E. C. Anderson, M. W. Ackerman, M. A. Hess, N. R. Campbell, S. R. Narum, and  
549 M. R. Campbell. 2013. A validation of parentage-based tagging using hatchery steelhead in  
550 the Snake River basin. *Canadian Journal of Fisheries and Aquatic Sciences* 70(7):1046–  
551 1054.
- 552 Steele, C. A., M. Hess, S. Narum, and M. Campbell. 2019. Parentage-based tagging: Reviewing  
553 the implementation of a new tool for an old problem. *Fisheries* 44(9):412–422.
- 554 Tattam, I. A., and J. R. Ruzycki. 2020. Smolt Transportation Influences Straying of Wild and  
555 Hatchery Snake River Steelhead into the John Day River. *Transactions of the American*

556 Fisheries Society 149(3):284–297.

557 Thompson, E. 1976. Inference of genealogical structure. *Social Science Information* 15(2–  
558 3):477–526.

559 Thompson, E. 2000. *Statistical inference from genetic data on pedigrees*. Institute of  
560 Mathematical Statistics, Beachwood, OH.

561 Vandeputte, M., A. Bestin, L. Fauchet, J. M. Allamellou, S. Bosc, O. Menchi, P. Haffray, and C.  
562 Saavedra. 2021. Can we identify wild-born salmon from parentage assignment data? A case  
563 study in the Garonne-Dordogne rivers salmon restoration programme in France. *Aquatic*  
564 *Living Resources* 34:7.

565 Waples, R. S., M. J. Ford, and D. Schmitt. 2007. Empirical results of salmon supplementation in  
566 the northeast pacific: a preliminary assessment. Pages 383–403 *in* T. M. Bert, editor.  
567 *Ecological and Genetic Implications of Aquaculture Activities*.

568 Warren, C., S. Rosenberger, and F. Bohlen. 2017. 2015 calendar year hatchery steelhead report:  
569 IPC and LSRCP monitoring and evaluation programs for the state of Idaho. IDFG Report  
570 Number 17-05  
571

| Hatchery | Data used         | Number of possible crosses per year | Years of potential grandparents | Number of potential grandchildren | Number of comparisons | Desired per-comparison false positive error rate |
|----------|-------------------|-------------------------------------|---------------------------------|-----------------------------------|-----------------------|--------------------------------------------------|
| USB      | None              | 4,290                               |                                 |                                   | 3,432,000             | $2.91 \cdot 10^{-8}$                             |
|          | Sex               | 1,088                               |                                 |                                   | 870,400               | $1.15 \cdot 10^{-7}$                             |
|          | Spawn day         | 584                                 |                                 |                                   | 467,200               | $2.14 \cdot 10^{-7}$                             |
|          | Spawn day and sex | 162                                 |                                 |                                   | 129,600               | $7.72 \cdot 10^{-7}$                             |
|          | Cross records     | 34                                  |                                 |                                   | 27,200                | $3.68 \cdot 10^{-6}$                             |
| DNFH     | None              | 3,134,670                           | 4                               | 200                               | 2,507,736,000         | $3.99 \cdot 10^{-11}$                            |
|          | Sex               | 769,348                             |                                 |                                   | 615,478,400           | $1.62 \cdot 10^{-10}$                            |
|          | Spawn day         | 284,270                             |                                 |                                   | 227,416,000           | $4.40 \cdot 10^{-10}$                            |
|          | Spawn day and sex | 69,709                              |                                 |                                   | 55,767,200            | $1.79 \cdot 10^{-9}$                             |
|          | Cross records     | 1,003                               |                                 |                                   | 802,400               | $1.25 \cdot 10^{-7}$                             |

573 Table 1. Desired per-comparison false positive (true relationship of unrelated) error rates for analyses using different data sources to  
574 reduce the number of comparisons.

575 Figure Legends

576 Figure 1. The pedigree the proposed method could be used to infer. H: hatchery-origin, W:  
577 natural-origin

578 Figure 2. Error rates estimated by importance sampling for simulated (A) SNP and (B)  
579 microhaplotype panels with varying numbers of loci.

580 Figure 3. Comparison of false positive (true relationship of unrelated) error rates for simulated  
581 microhaplotype panels estimated by importance sampling and stratified sampling. The black line  
582 represents  $y = x$ . Points shown on the y-axis had an estimated error rate of 0 from stratified  
583 sampling.

584 Figure 4. Comparison of false positive error rates estimated by importance sampling and  
585 stratified sampling for related trios with the simulated 300 locus microhaplotype panel. The  
586 black line represents  $y = x$ . The two putative grandparents were unrelated to each other. The  
587 relationship labels indicate the relationship of the two putative grandparents to the putative  
588 grandchild. Where the label is only one relationship, both putative grandparents have the same  
589 relationship to the putative grandchild. True is true grandparent, GAunt is great-aunt, HGAunt is  
590 half great-aunt, GpCous is first-cousin to the putative grandchild's true grandparent, Unrel is  
591 unrelated. The inset gives a magnified view of the region containing error rates close to 1.

592 Figure 5. Error rates estimated by importance sampling for the simulated 300 locus  
593 microhaplotype panel with two rates of missing genotypes: 3% (Missing) and 0% (No missing).  
594 False positive error rate is the rate for unrelated trios.

595 Supplemental Figure 1. Error rates estimated by stratified sampling for the simulated 300 locus  
596 microhaplotype panel for select related trios. The two putative grandparents were unrelated to  
597 each other. The relationship labels indicate the relationship of the two putative grandparents to  
598 the putative grandchild. True is true grandparent, GAunt is great-aunt, HGAunt is half great-aunt,  
599 Unrel is unrelated.

600

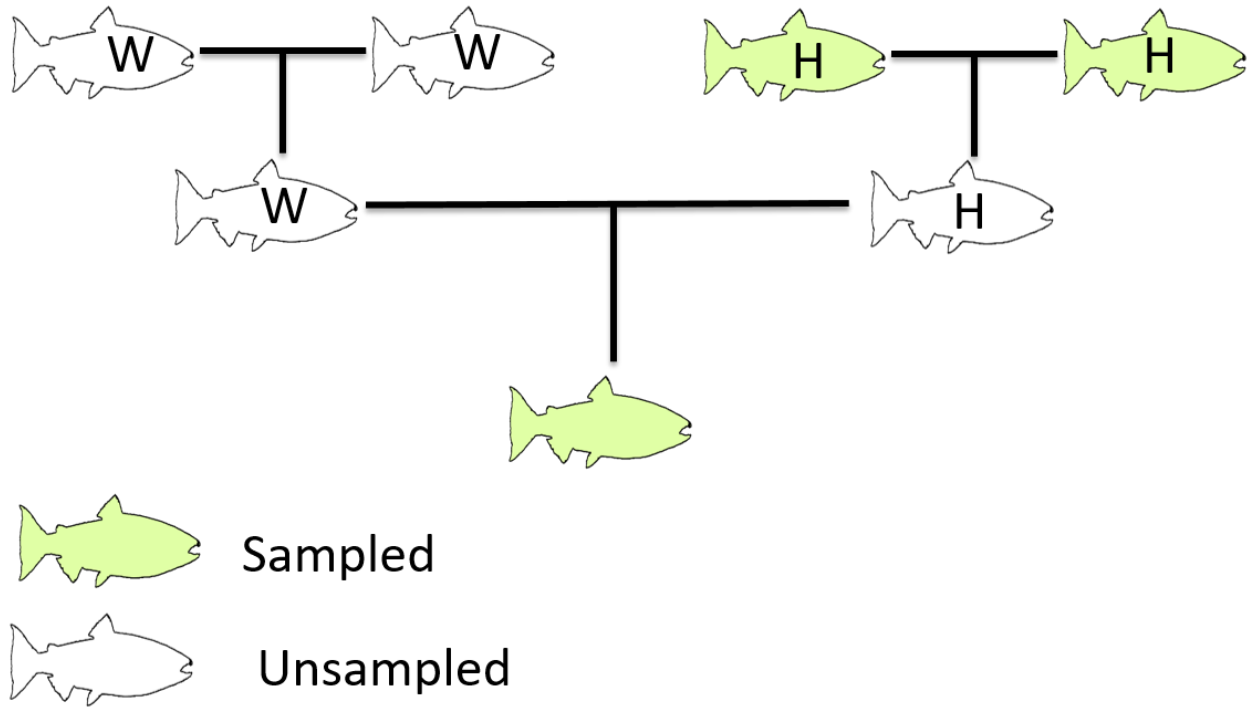

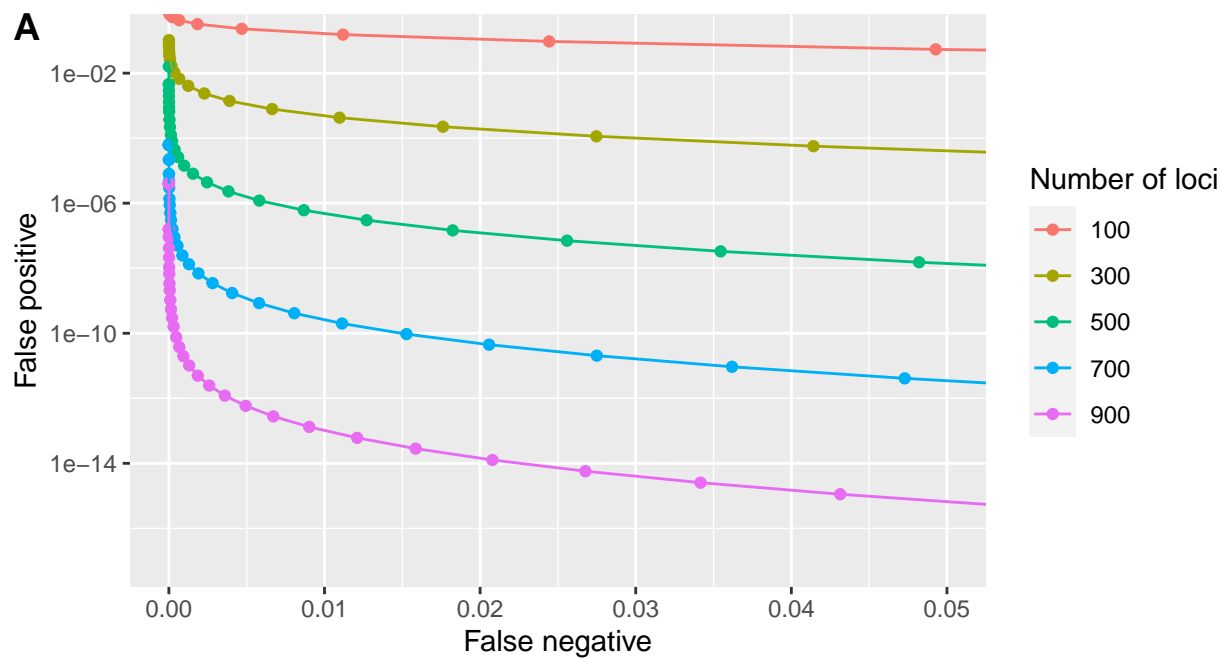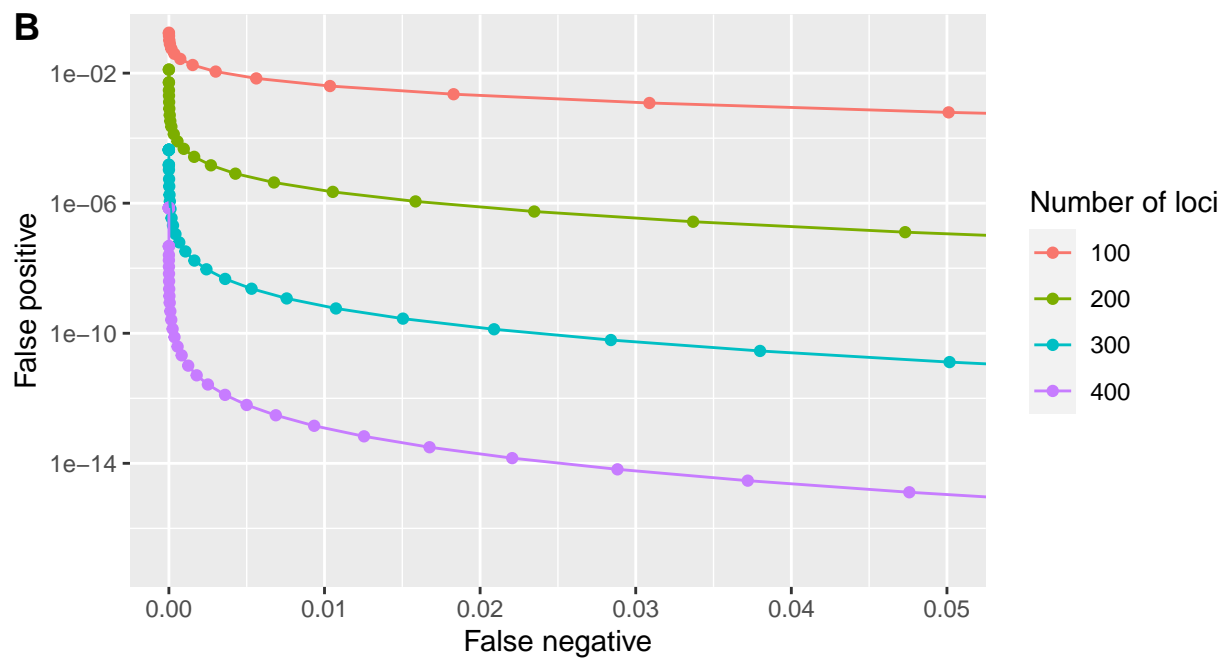

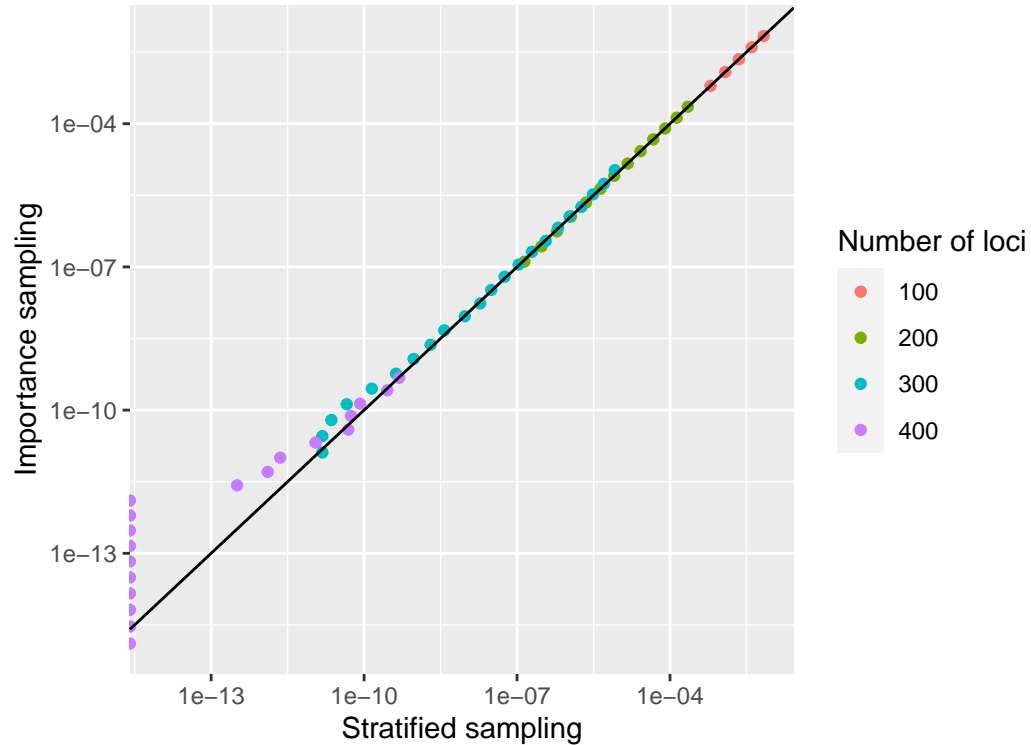



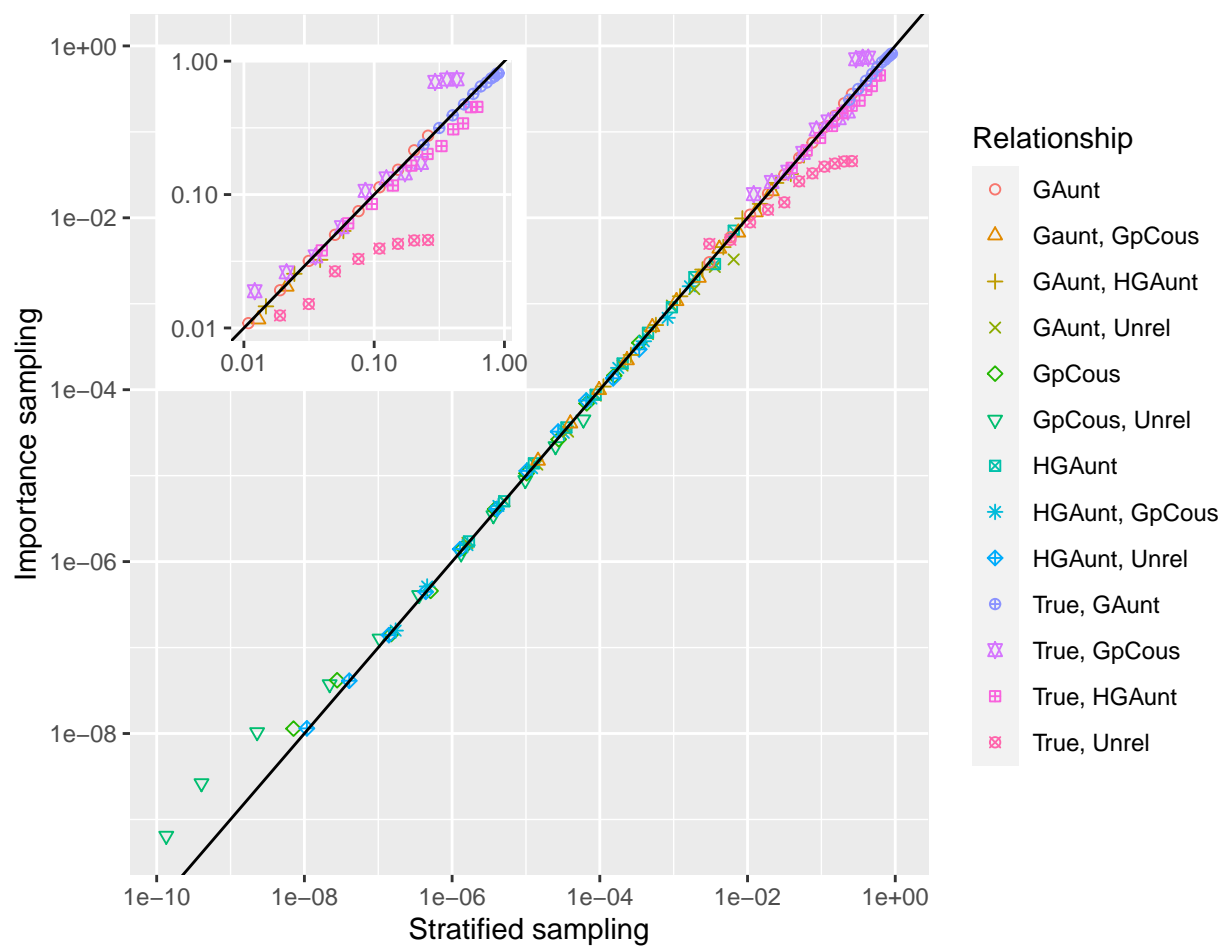

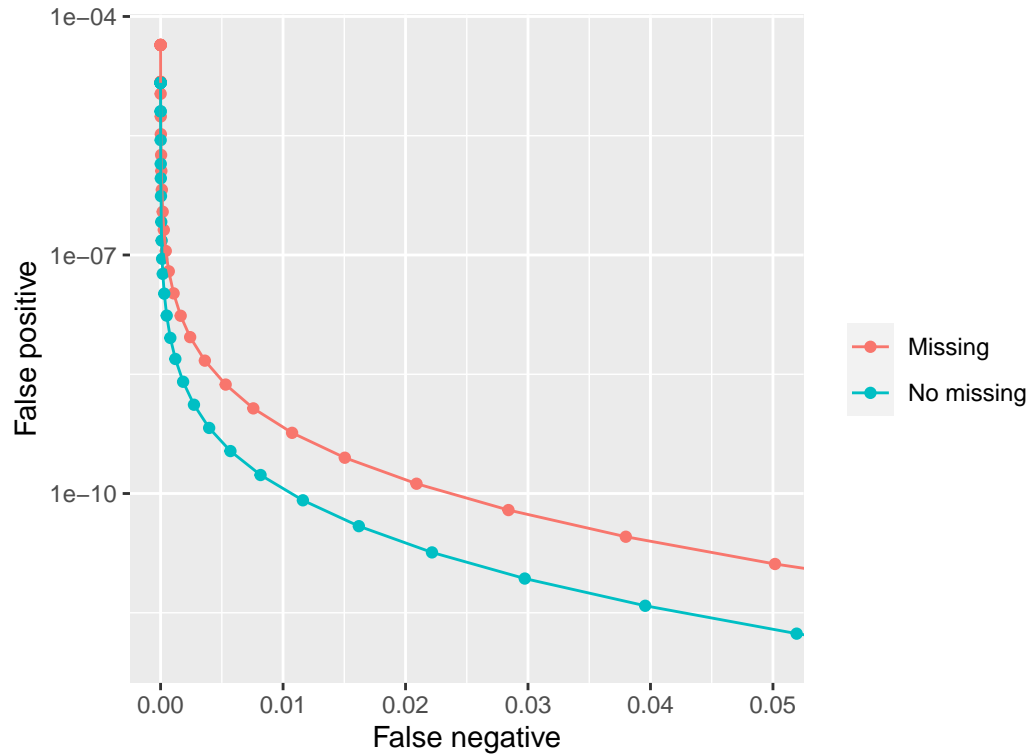

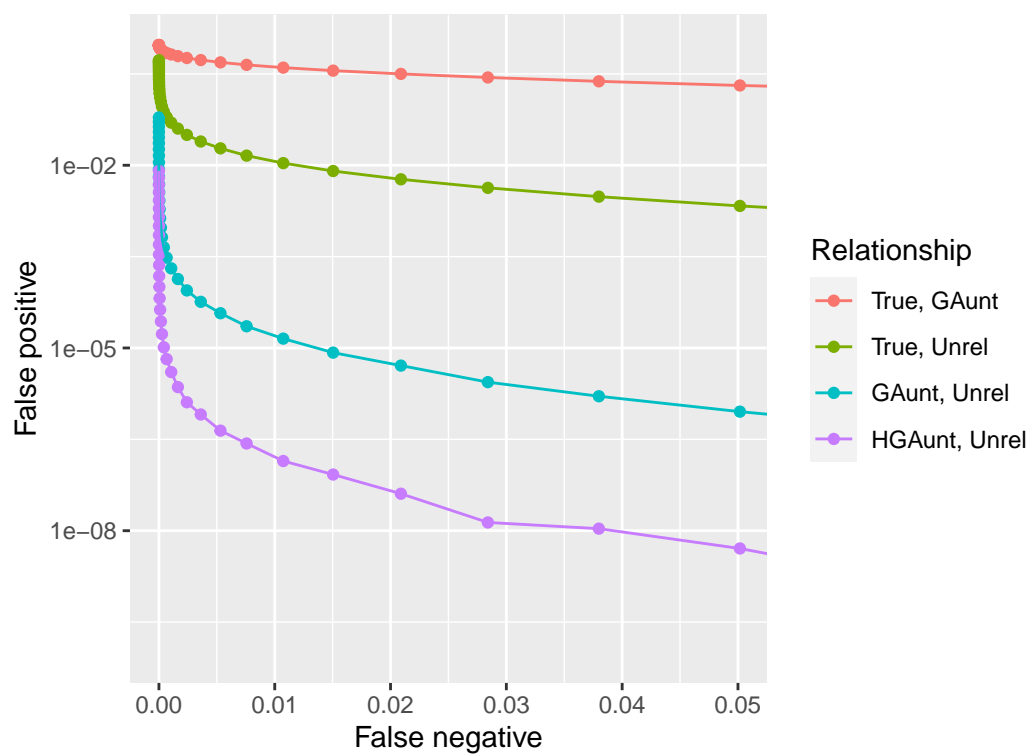

1  
2

## Supplementary file 1

### 3 1 Default error model for gRandma

4 Each locus is treated separately and each genotype is treated as two observations (one for each allele in the  
5 presumed diploid). For a given locus, the error model first relies upon a "per allele error rate",  $\epsilon$ , which  
6 represent the probability that, when observing one allele, you observe any allele other than the true one.  
7 The default value is 0.005, or 0.5%. This value is used along with a measure of similarity between alleles to  
8 calculate the probability of observing each allele given the true allele. For a locus with  $I$  alleles, given the  
9 true allele  $i$ , the probability of correctly observing  $i$  is  $1 - \epsilon$  and the probability of observing allele  $j$  where  
10  $j \neq i$  is

$$P(j|i) = \epsilon \cdot \frac{s_{ij}}{\sum_{k=1}^I s_{ik}}, \quad (1)$$

11 where  $s_{ij}$  is the similarity between alleles  $i$  and  $j$  and  $s_{ii} = 0$ . The measure of similarity between two alleles  
12 of a microhaplotype used here was the reciprocal of the number of base pair differences between them.

13 These probabilities are then used to calculate the probability of observing each genotype given a true  
14 homozygous genotype. The probability of observing a genotype of BC given a true genotype of AA is

$$P(BC|AA) = \begin{cases} 2 \cdot P(B|A)P(C|A), & B \neq C \\ P(B|A)^2, & B = C, \end{cases} \quad (2)$$

15 according to basic probability arguments, where  $P(B|A)$  is the probability of observing B when the true allele  
16 is A. The probability of observing each possible genotype given a true heterozygous genotype is calculated  
17 similarly, but also incorporates a probability of allelic dropout for each allele. Each allele is given a probability  
18 of dropping out,  $d_i$  for allele  $i$ , and in the current study a probability of 0.005 was used for all alleles.  
19 It is assumed that allelic dropout events are disjoint, and so the probability of no dropout occurring is  
20  $1 - d_i - d_j$ . The probability of observing each genotype given no dropout can be calculated using the  
21 observation probabilities for each allele calculated in equation 1. The probability of observing a given  
22 genotype if a dropout has occurred is taken to be the probability of observing that genotype given a true  
23 homozygous genotype for the remaining allele. The total probability of observing a genotype is the sum of

24 the probabilities of all three cases (no dropout, allele 1 dropout, allele 2 dropout).

## 25 2 Physical linkage

26 In the combined genotypes of the grandparents, at locus 1 alleles  $A_1, A_2, A_3, A_4$  are present, and at locus 2  
27 alleles  $B_1, B_2, B_3, B_4$  are present. If the loci are unlinked, the probability of the grandchild inheriting  $A_1, B_1$   
28 from the grandparents is  $0.25 \cdot 0.25 = 0.0625$ . If the loci are linked, there are three cases to consider:

- 29 1.  $A_1$  and  $B_1$  are on the same chromosome
- 30 2.  $A_1$  and  $B_1$  are on different chromosomes in the same grandparent
- 31 3.  $A_1$  and  $B_1$  are on different chromosomes in different grandparents

32 The probability of case 1 is 0.25, because the loci are in linkage equilibrium, and so  $B_1$  is equally likely to  
33 be on the same chromosome as any of the alleles at locus 1. Similarly, the probability of cases 2 and 3 are  
34 0.25 and 0.5, respectively.

35 Under case 1, the probability the unsampled parent inherits  $A_1$  and  $B_1$  is  $0.5(1 - r)$ , where  $r$  is the  
36 probability of a recombination event and the probability the grandchild then inherits  $A_1$  and  $B_1$  is  $0.5(1 - r)$ .  
37 So, the probability the grandchild inherits  $A_1$  and  $B_1$  under case 1 is  $0.25(1 - r)^2$ .

38 Under case 2, the probability the unsampled parent inherits  $A_1$  and  $B_1$  is  $0.5r$  and the probability the  
39 grandchild then inherits  $A_1$  and  $B_1$  is  $0.5(1 - r)$ . So, the probability the grandchild inherits  $A_1$  and  $B_1$  under  
40 case 2 is  $0.25r(1 - r)$ .

41 Under case 3, the probability the unsampled parent inherits  $A_1$  and  $B_1$  is  $0.5 \cdot 0.5 = 0.25$  and the  
42 probability the grandchild then inherits  $A_1$  and  $B_1$  is  $0.5r$ . So, the probability the grandchild inherits  $A_1$   
43 and  $B_1$  under case 3 is  $0.125r$ .

44 Combining all three cases, we find that the probability of a grandchild inheriting  $A_1$  and  $B_1$  from the  
45 grandparents is

$$0.25 \cdot 0.25(1 - r)^2 + 0.25 \cdot 0.25r(1 - r) + 0.5 \cdot 0.125r \tag{3}$$

$$0.0625(1 - r)^2 + 0.0625r(1 - r) + 0.0625r \tag{4}$$

$$0.0625((1 - r)^2 + r(1 - r) + r) \tag{5}$$

$$0.0625(1). \tag{6}$$
